# Supplementary material
Source: publisher figshare collection journal article supplement (https://tandf.figshare.com/articles/dataset/_/7726310)
Supplement: Supplementary file 1 [file 2]

Archive with 4 entries (4 files):
- Appendix 1 - SOS-WRIST.pdf
- Appendix 2 - SOS-WRIST.pdf
- Appendix 3 - SOS-WRIST.pdf
- Supplemental material.docx
