# Supplementary material
Source: publisher figshare collection journal article supplement (https://tandf.figshare.com/articles/dataset/_/7726310)
Supplement: Supplementary file 1 [file 2 › Appendix 1 - SOS-WRIST.pdf]

---

**Appendix 1. Literature search**

---

**PubMed (1966 to September 2014)**

Date of search: September 24th, 2014

(Child[Mesh] OR child[tw] OR children[tw] OR childhood[tw] OR Adolescent[Mesh] OR adolescen\*[tw] OR teen\*[tw] OR Puberty[Mesh] OR puberty[tw] OR pubescen\*[tw] OR prepubescen\*[tw] OR prepuberty[tw] OR young adult\*[tw] OR school age[tw] OR highschool\*[tw] OR high school\*[tw]) AND (((wrist[MeSH Terms] OR wrist\*[tw] OR wrist joint[MeSH Terms] OR (wrist[tw] AND joint[tw]) OR wrist joint[tw]) OR (radius[MeSH Terms] OR radius[tw]) OR (ulna[MeSH Terms] OR ulna[tw]) OR (Carpal Bones[Mesh] OR carpal bone\*[tw]) OR (Upper Extremity[Mesh] OR upper extrem\*[tw])) AND (Pain[Mesh] OR pain\*[tw] OR ache\*[tw] OR discomfort\*[tw] OR symptom\*[tw] OR injur\*[tw] OR Wrist Injuries[Mesh] OR Pain Measurement[Mesh] OR pain measurement\*[tw] OR pain assessment\*[tw] OR pain scale\*[tw])) OR (((wrist[MeSH Terms] OR wrist\*[tw] OR wrist joint[MeSH Terms] OR (wrist[tw] AND joint[tw]) OR wrist joint[tw]) OR (radius[MeSH Terms] OR radius[tw]) OR (ulna[MeSH Terms] OR ulna[tw]) OR (Carpal Bones[Mesh] OR carpal bone\*[tw]) OR (Upper Extremity[Mesh] OR upper extrem\*[tw])) AND (function\*[tw] OR perform\*[tw] OR activit\*[tw] OR "Activities of Daily Living"[Mesh] OR daily living\*[tw] OR ADL[tw] OR self care\*[tw] ))) AND (Questionnaires[Mesh] OR questionnaire\*[tw] OR self report\*[tw] OR measurement instrument\*[tw] OR Outcome Assessment (Health Care)[Mesh] OR outcome assessment\*[tw] OR "Patient Outcome Assessment"[Mesh] OR patient-centered outcome\*[tw] OR PROM[tw] OR patient-reported outcome\*[tw] OR "Symptom Assessment"[Mesh] OR symptom\* assessment\*[tw] OR symptom\* evaluation\*[tw]))

**Results: 408 records**

---

**Embase via OvidSP (1947 to September 2014)**

Date of search: September 24th, 2014

child\*.sh,ti,ab,kw.  
(pediat\* or paediat\*).ti,ab,kw.  
(pubescen\* or prepubescen\*).ti,ab,kw.  
puberty.sh,ti,ab,kw.  
prepuberty\*.sh,ti,ab,kw.  
teen\*.ti,ab,kw.  
adolescen\*.sh,ti,ab,kw.  
youngster?.ti,ab,kw.  
youth?.ti,ab,kw.  
childhood.sh,ti,ab,kw.  
minors.ti,ab,kw.  
under ag\*.ti,ab,kw.  
school child.sh,ti,ab,kw.  
preadolesc\*.ti,ab,kw.  
young adulthood.ti,ab,kw.  
high school?.sh,ti,ab,kw.  
highschool.ti,ab,kw.  
or/1-17[<Concept 1>: Kinderen]  
wrist/  
wrist?.ti,ab,kw.

---

(radius or ulna? or carpal bone? or carpal joint?).sh,ti,ab,kw.

upper extremity\*.ti,ab,kw.

or/19-22 [<Concept 2>: Pols]

exp pain/

pain\*.sh,ti,ab,kw.

ache\*.sh,ti,ab,kw.

discomfort\*.sh,ti,ab,kw.

symptom\*.sh,ti,ab,kw.

injur\*.sh,ti,ab,kw.

pain measurement\*.sh,ti,ab,kw.

exp pain assessment/

pain assessment\*.sh,ti,ab,kw.

pain parameters/

pain scale\*.sh,ti,ab,kw.

wrist injury/

or/24-35 [<Concept 3>: Pijn]

function\*.sh,ti,ab,kw.

performance/

exp physical performance/

perform\*.sh,ti,ab,kw.

activit\*.sh,ti,ab,kw.

exp daily life activity/

daily living\*.sh,ti,ab,kw.

ADL.sh,ti,ab,kw.

self care/

self care\*.sh,ti,ab,kw.

or/37-46 [<Concept 4>: Functioneren]

exp questionnaire/

questionnaire\*.sh,ti,ab,kw.

self report/

self report\*.sh,ti,ab,kw.

measurement instrument\*.sh,ti,ab,kw.

exp outcome assessment/

outcome assessment\*.sh,ti,ab,kw.

patient-centered outcome\*.sh,ti,ab,kw.

PROM.sh,ti,ab,kw.

patient-reported outcome\*.sh,ti,ab,kw.

symptom assessment/

symptom\* assessment\*.sh,ti,ab,kw.

symptom\* evaluation\*.sh,ti,ab,kw.

or/48-60 [<Concept 5>: Meetinstrument]

20 and 36

20 and 47

62 or 63

18 and 64 and 61

**Results: 371 records**

---
