# Supplementary material
Source: publisher figshare collection journal article supplement (https://tandf.figshare.com/articles/dataset/_/7726310)
Supplement: Supplementary file 1 [file 2 › Appendix 2 - SOS-WRIST.pdf]

Appendix 2. Literature search flow chart

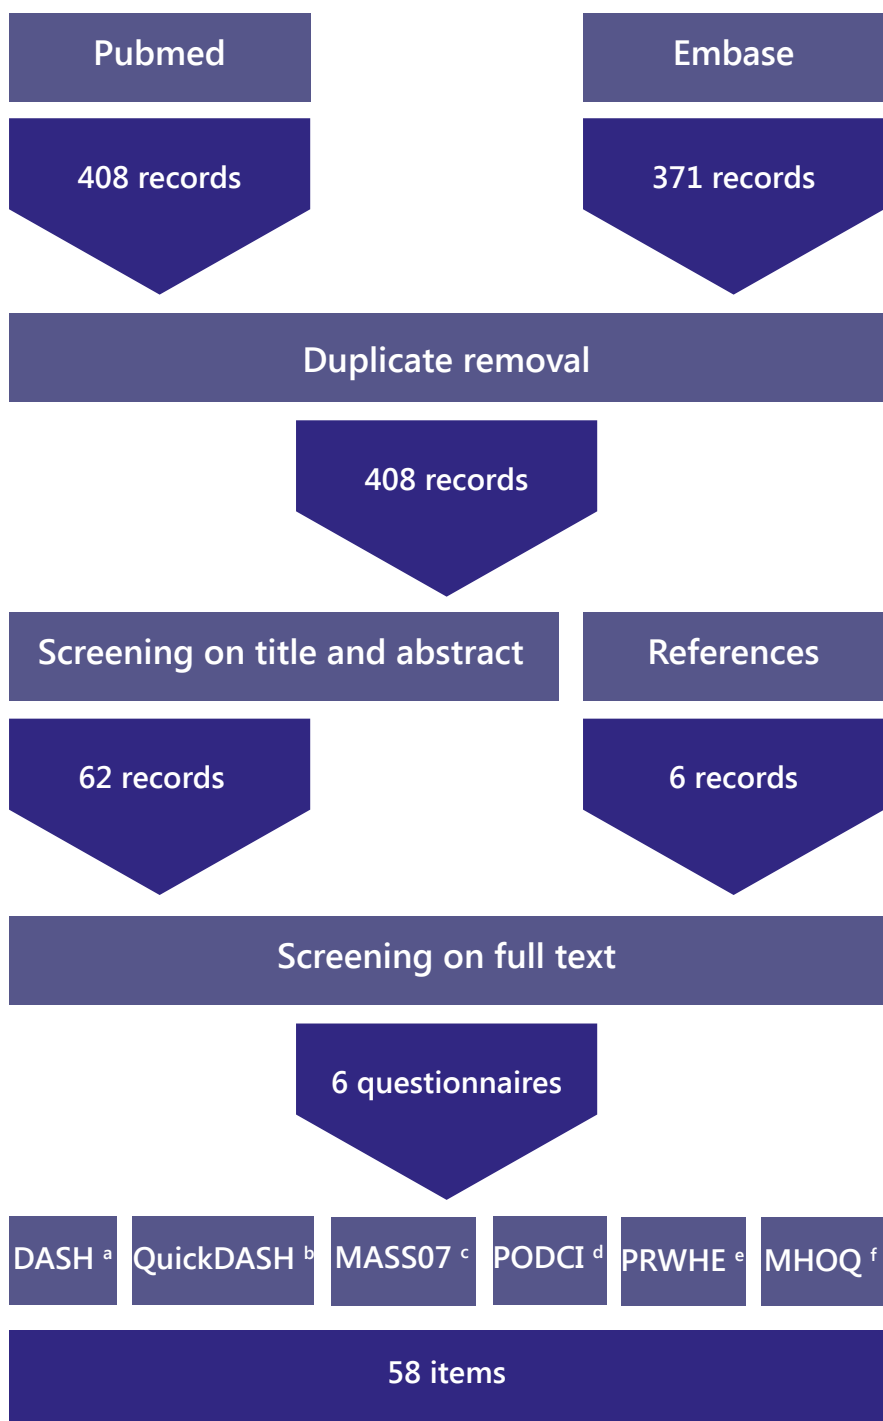

a) Kennedy, C. A., et al. (2011). Disabilities of the Arm, Shoulder and Hand (DASH). The DASH and QuickDASH Outcome Measure User's Manual. Toronto, Ontario, Institute for Work & Health.

b) Beaton, D. E., et al. (2005). "Development of the QuickDASH: Comparison of three item-reduction approaches." Journal of Bone and Joint Surgery (American Volume) 87a(5): 1038-1046.

c) Alexander, M., et al. (2008). "Validation of a modern activity hand survey with respect to reliability, construct and criterion validity." Journal of Hand Surgery, European Volume 33(5): 653-660.

d) Daltroy, L. H., et al. (1998). "The POSNA pediatric musculoskeletal functional health questionnaire: report on reliability, validity, and sensitivity to change. Pediatric Outcomes Instrument Development Group. Pediatric Orthopaedic Society of North America." Journal of Pediatric Orthopaedics 18(5): 561-571.

e) MacDermid, J. C. (1996). "Development of a scale for patient rating of wrist pain and disability." Journal of Hand Therapy 9(2): 178-183.

f) Chung, K. C., et al. (1998). "Reliability and validity testing of the Michigan Hand Outcomes Questionnaire." Journal of Hand Surgery 23(4): 575-587.
