# Supplementary material
Source: publisher figshare collection journal article supplement (https://tandf.figshare.com/articles/dataset/_/7726310)
Supplement: Supplementary file 1 [file 2 › Supplemental material.docx]

**Appendices**

**Appendix 1.** Literature search

**Appendix 2.** Literature search flow chart

**Appendix 3.** Items marked as important by focus group participants [25, 26]
